# Supplementary material for: Treg cells from human blood differentiate into non-lymphoid tissue-resident effector cells upon TNFR2 costimulation
Source: JCI journal article supplement (doi:10.1172/jci.insight.172942), 2024-01-30
Supplement: sd1 [file 1]

You are being redirected.
