# Supplementary material for: Treg cells from human blood differentiate into non-lymphoid tissue-resident effector cells upon TNFR2 costimulation
Source: JCI journal article supplement (doi:10.1172/jci.insight.172942), 2024-01-30
Supplement: sd5 [file 5]

|                                              |                                             |
|----------------------------------------------|---------------------------------------------|
| <b>Maternal age</b> (years), mean (SD)       | 33.75 (3.77)                                |
| <b>Gestational age</b> (weeks), mean (SD)    | 37.8 (1.50)                                 |
| <b>Gravity</b> , mean (SD)                   | 3.5 (1.29)                                  |
| <b>Parity</b> , mean (SD)                    | 1.5 (0.57)                                  |
| <b>Mode of delivery</b> (%)                  | Caesarean section (75%) / Spontaneous (25%) |
| <b>Sex of child</b> (%)                      | Female (100%)                               |
| <b>Fetal birth weight</b> (grams), mean (SD) | 3067 (322.09)                               |

**Supplemental Table 4.** Clinical characteristics of women included for placenta and maternal peripheral blood analysis.
